# Supplementary material
Source: PubMed Central journal article supplement (PMC6364769)
Supplement: supp_RA118.005222_139923_2_supp_250561_pjnf6p.pdf [file supp_RA118.005222_139923_2_supp_250561_pjnf6p.pdf]

*Supporting figures:*

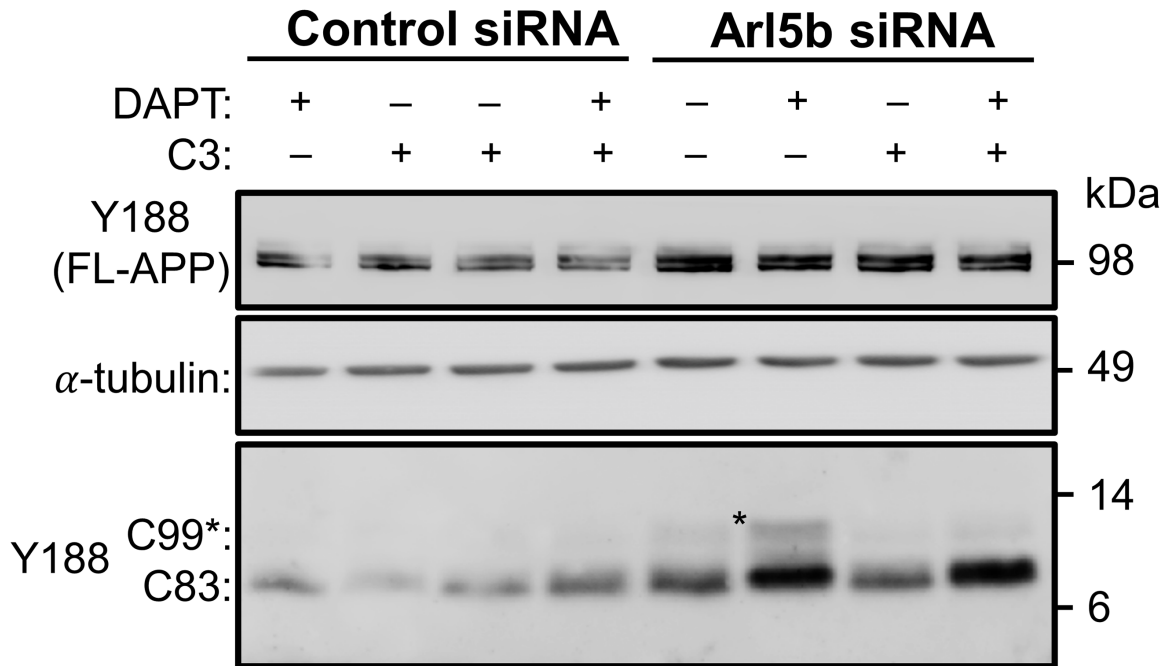

**Figure S1** *Arl5b* depletion results in enhanced non-amyloidogenic processing at the Golgi  
 HeLa-APP<sub>695wt</sub> cells were transfected with either control siRNA or *Arl5b* siRNA for 72 h and also treated with either DMSO (carrier), 250 nM DAPT ( $\gamma$ -secretase inhibitor), 2  $\mu$ M C3 (BACE1 inhibitor), or 250 nM DAPT and 2  $\mu$ M C3 in the last 16 h of siRNA transfection. Cell extracts (20  $\mu$ g) were analysed by immunoblotting with rabbit anti-APP (Y188).
